# Supplementary material for: Apiaceae FNS I originated from F3H through tandem gene duplication
Source: PubMed Central journal article supplement (PMC9851555; doi:10.1371/journal.pone.0280155), 2023-01-19
Supplement: pone.0280155.s003.pdf [file pone.0280155.s003.pdf]

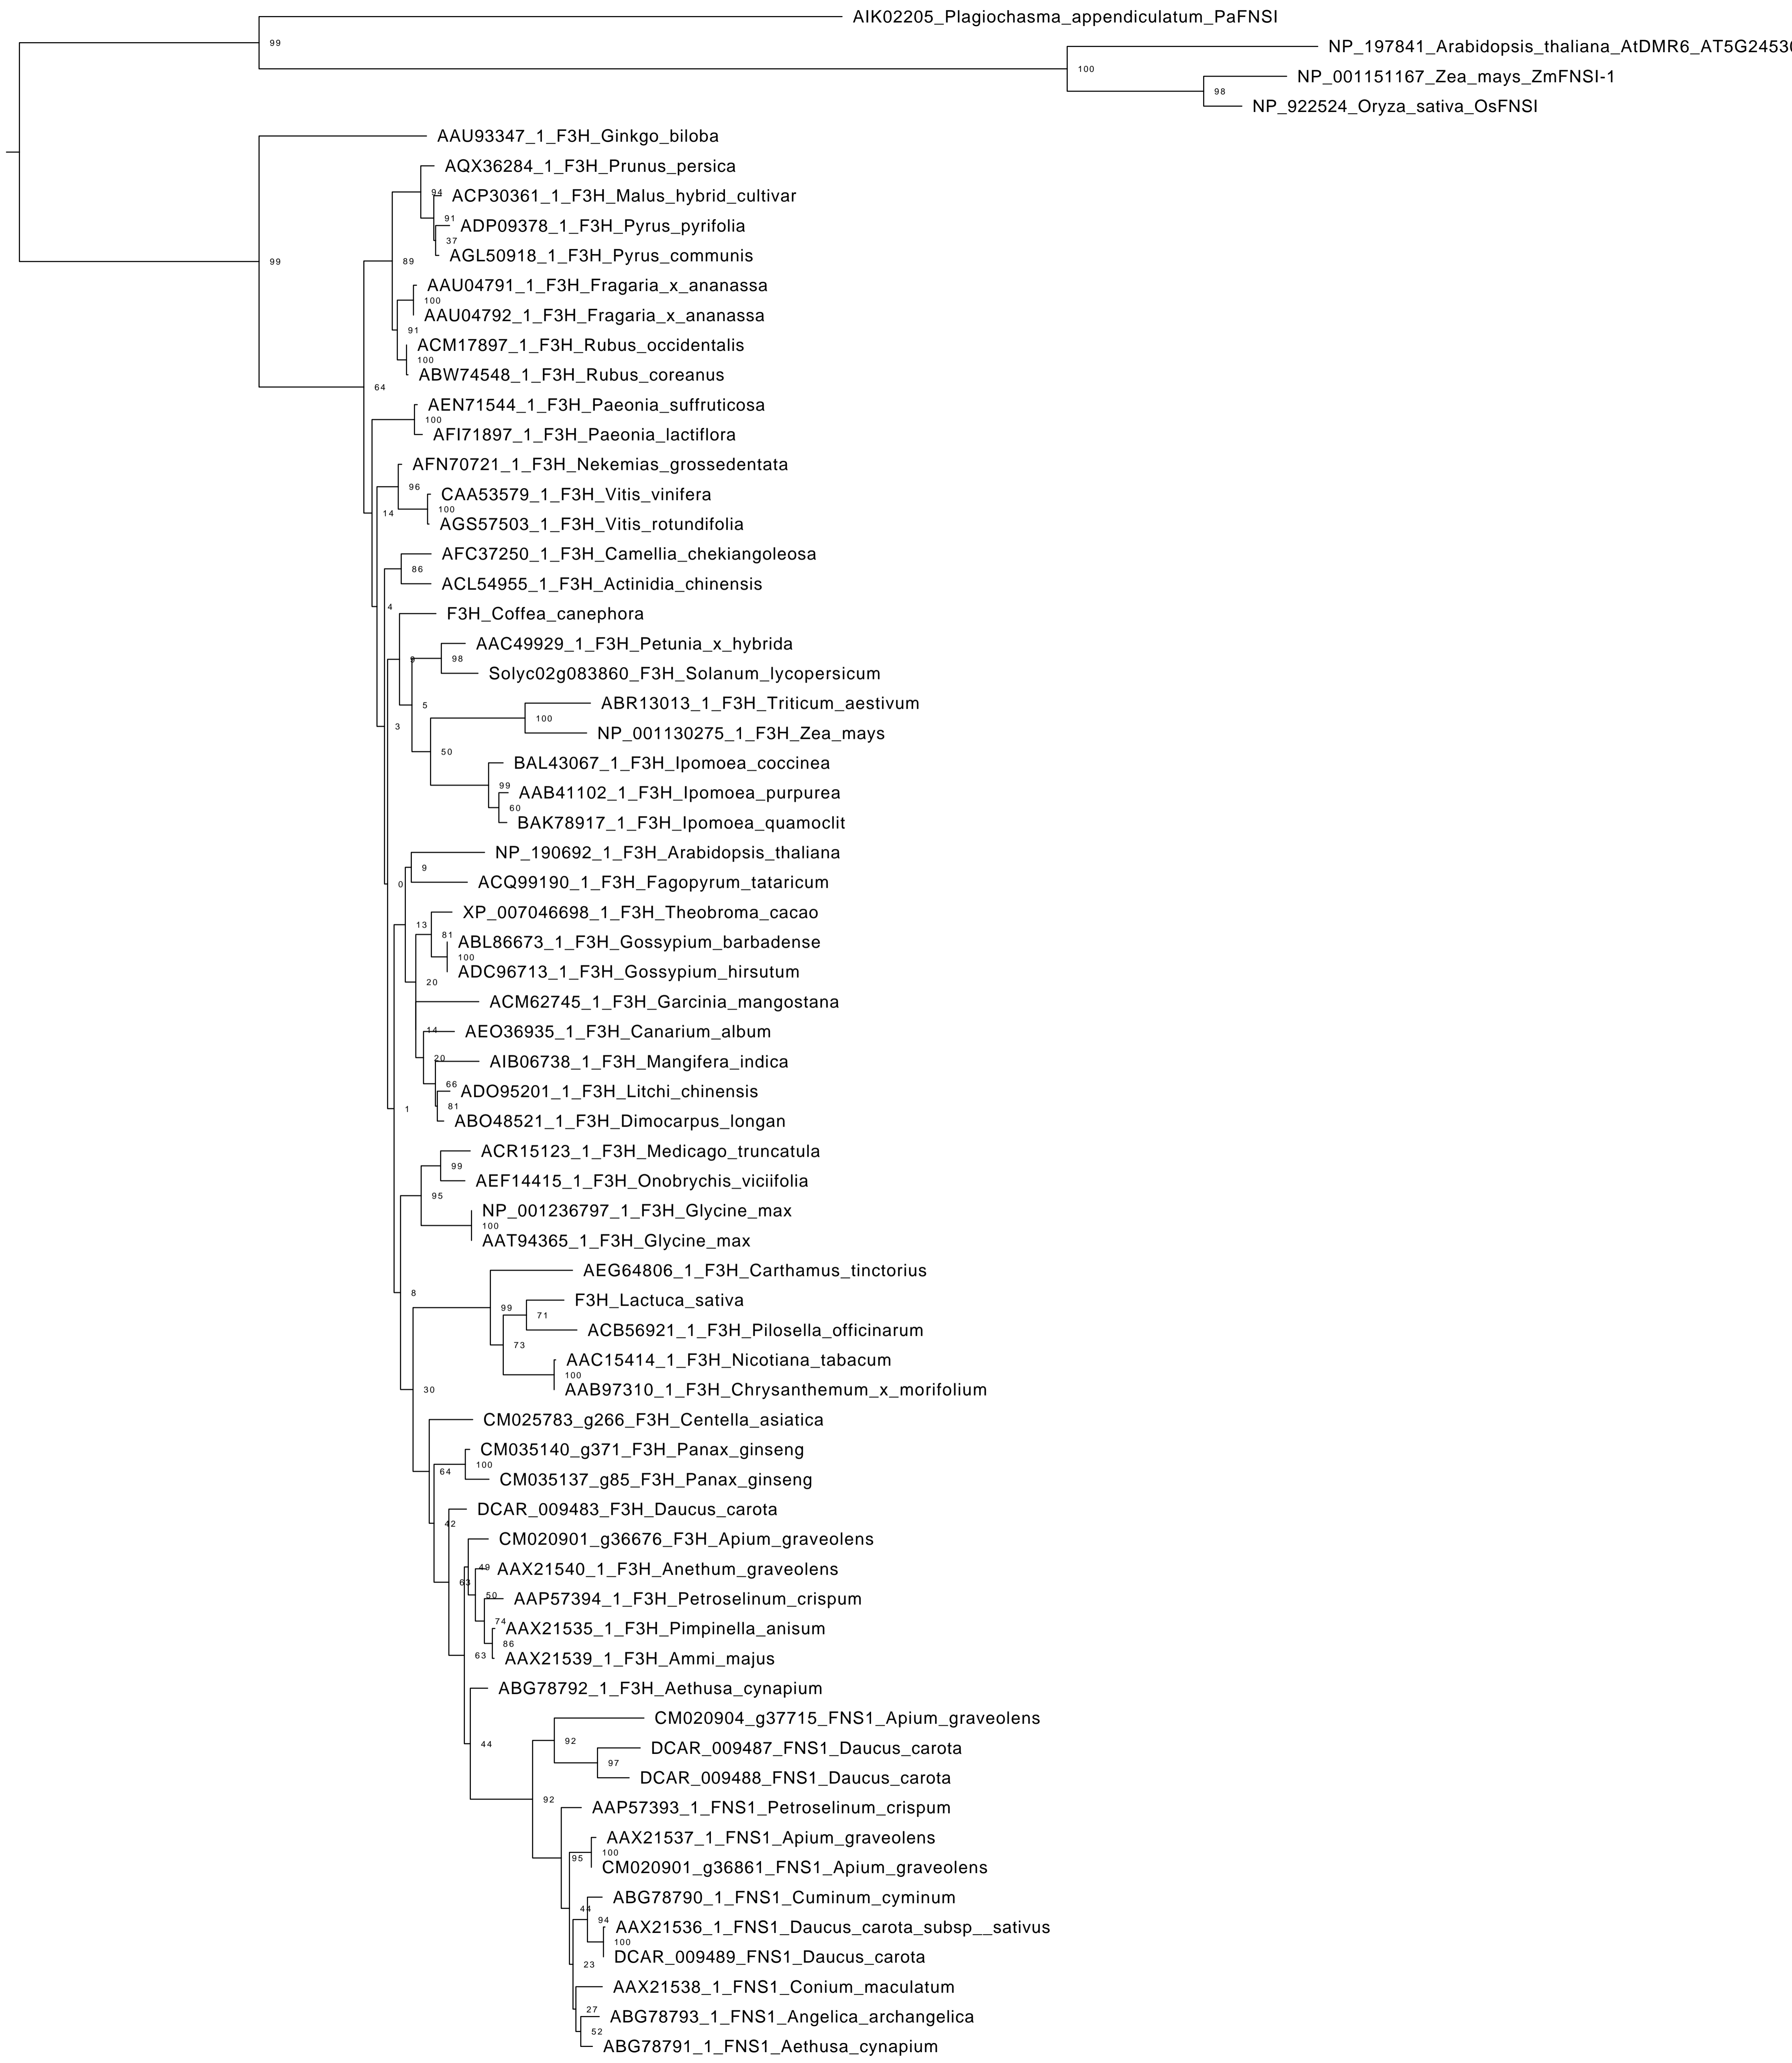

100

NP\_197841\_Arabidopsis\_thaliana\_AtDMR6\_AT5G24530

100

NP\_922524\_Oryza\_sativa\_OsFNSI

NP\_001151167\_Zea\_mays\_ZmFNSI-1

AAU93347\_1\_F3H\_Ginkgo\_biloba

AEG64806\_1\_F3H\_Carthamus\_tinctorius

F3H\_Lactuca\_sativa

ACB56921\_1\_F3H\_Pilosella\_officinatum

AAB97310\_1\_F3H\_Chrysanthemum\_x\_morifolium

AAC15414\_1\_F3H\_Nicotiana\_tabacum

CM035137\_g85\_F3H\_Panax\_ginseng

CM035140\_g371\_F3H\_Panax\_ginseng

CM025783\_g266\_F3H\_Centella\_asiatica

DCAR\_009483\_F3H\_Daucus\_carota

CM020901\_g36676\_F3H\_Apium\_graveolens

AAX21540\_1\_F3H\_Anethum\_graveolens

AAP57394\_1\_F3H\_Petroselinum\_crispum

AAX21539\_1\_F3H\_Ammi\_majus

AAX21535\_1\_F3H\_Pimpinella\_anisum

ABG78792\_1\_F3H\_Aethusa\_cynapium

CM020904\_g37715\_FNS1\_Apium\_graveolens

DCAR\_009487\_FNS1\_Daucus\_carota

DCAR\_009488\_FNS1\_Daucus\_carota

AAP57393\_1\_FNS1\_Petroselinum\_crispum

CM020901\_g36861\_FNS1\_Apium\_graveolens

AAX21537\_1\_FNS1\_Apium\_graveolens

AAX21538\_1\_FNS1\_Conium\_maculatum

ABG78791\_1\_FNS1\_Aethusa\_cynapium

ABG78793\_1\_FNS1\_Angelica\_archangelica

ABG78790\_1\_FNS1\_Cuminum\_cyminum

DCAR\_009489\_FNS1\_Daucus\_carota

AAX21536\_1\_FNS1\_Daucus\_carota\_subsp\_sativus

AEF14415\_1\_F3H\_Onobrychis\_viciifolia

ACR15123\_1\_F3H\_Medicago\_truncatula

NP\_001236797\_1\_F3H\_Glycine\_max

AAT94365\_1\_F3H\_Glycine\_max

AFN70721\_1\_F3H\_Nekemias\_grossedentata

AGS57503\_1\_F3H\_Vitis\_rotundifolia

CAA53579\_1\_F3H\_Vitis\_vinifera

NP\_190692\_1\_F3H\_Arabidopsis\_thaliana

AFI71897\_1\_F3H\_Paeonia\_lactiflora

AEN71544\_1\_F3H\_Paeonia\_suffruticosa

AFC37250\_1\_F3H\_Camellia\_chekiangoleosa

ACL54955\_1\_F3H\_Actinidia\_chinensis

F3H\_Coffea\_canephora

Solyc02g083860\_F3H\_Solanum\_lycopersicum

AAC49929\_1\_F3H\_Petunia\_x\_hybrida

ACQ99190\_1\_F3H\_Fagopyrum\_tataricum

XP\_007046698\_1\_F3H\_Theobroma\_cacao

ADC96713\_1\_F3H\_Gossypium\_hirsutum

ABL86673\_1\_F3H\_Gossypium\_barbadense

AEO36935\_1\_F3H\_Canarium\_album

ACM62745\_1\_F3H\_Garcinia\_mangostana

AIB06738\_1\_F3H\_Mangifera\_indica

ADO95201\_1\_F3H\_Litchi\_chinensis

ABO48521\_1\_F3H\_Dimocarpus\_longan

NP\_001130275\_1\_F3H\_Zea\_mays

ABR13013\_1\_F3H\_Triticum\_aestivum

AAB41102\_1\_F3H\_Ipomoea\_purpurea

BAK78917\_1\_F3H\_Ipomoea\_quamoclit

BAL43067\_1\_F3H\_Ipomoea\_coccinea

AAU04791\_1\_F3H\_Fragaria\_x\_ananassa

AAU04792\_1\_F3H\_Fragaria\_x\_ananassa

ACM17897\_1\_F3H\_Rubus\_occidentalis

ABW74548\_1\_F3H\_Rubus\_coreanus

AQX36284\_1\_F3H\_Prunus\_persica

AGL50918\_1\_F3H\_Pyrus\_communis

ACP30361\_1\_F3H\_Malus\_hybrid\_cultivar

ADP09378\_1\_F3H\_Pyrus\_pyrifolia

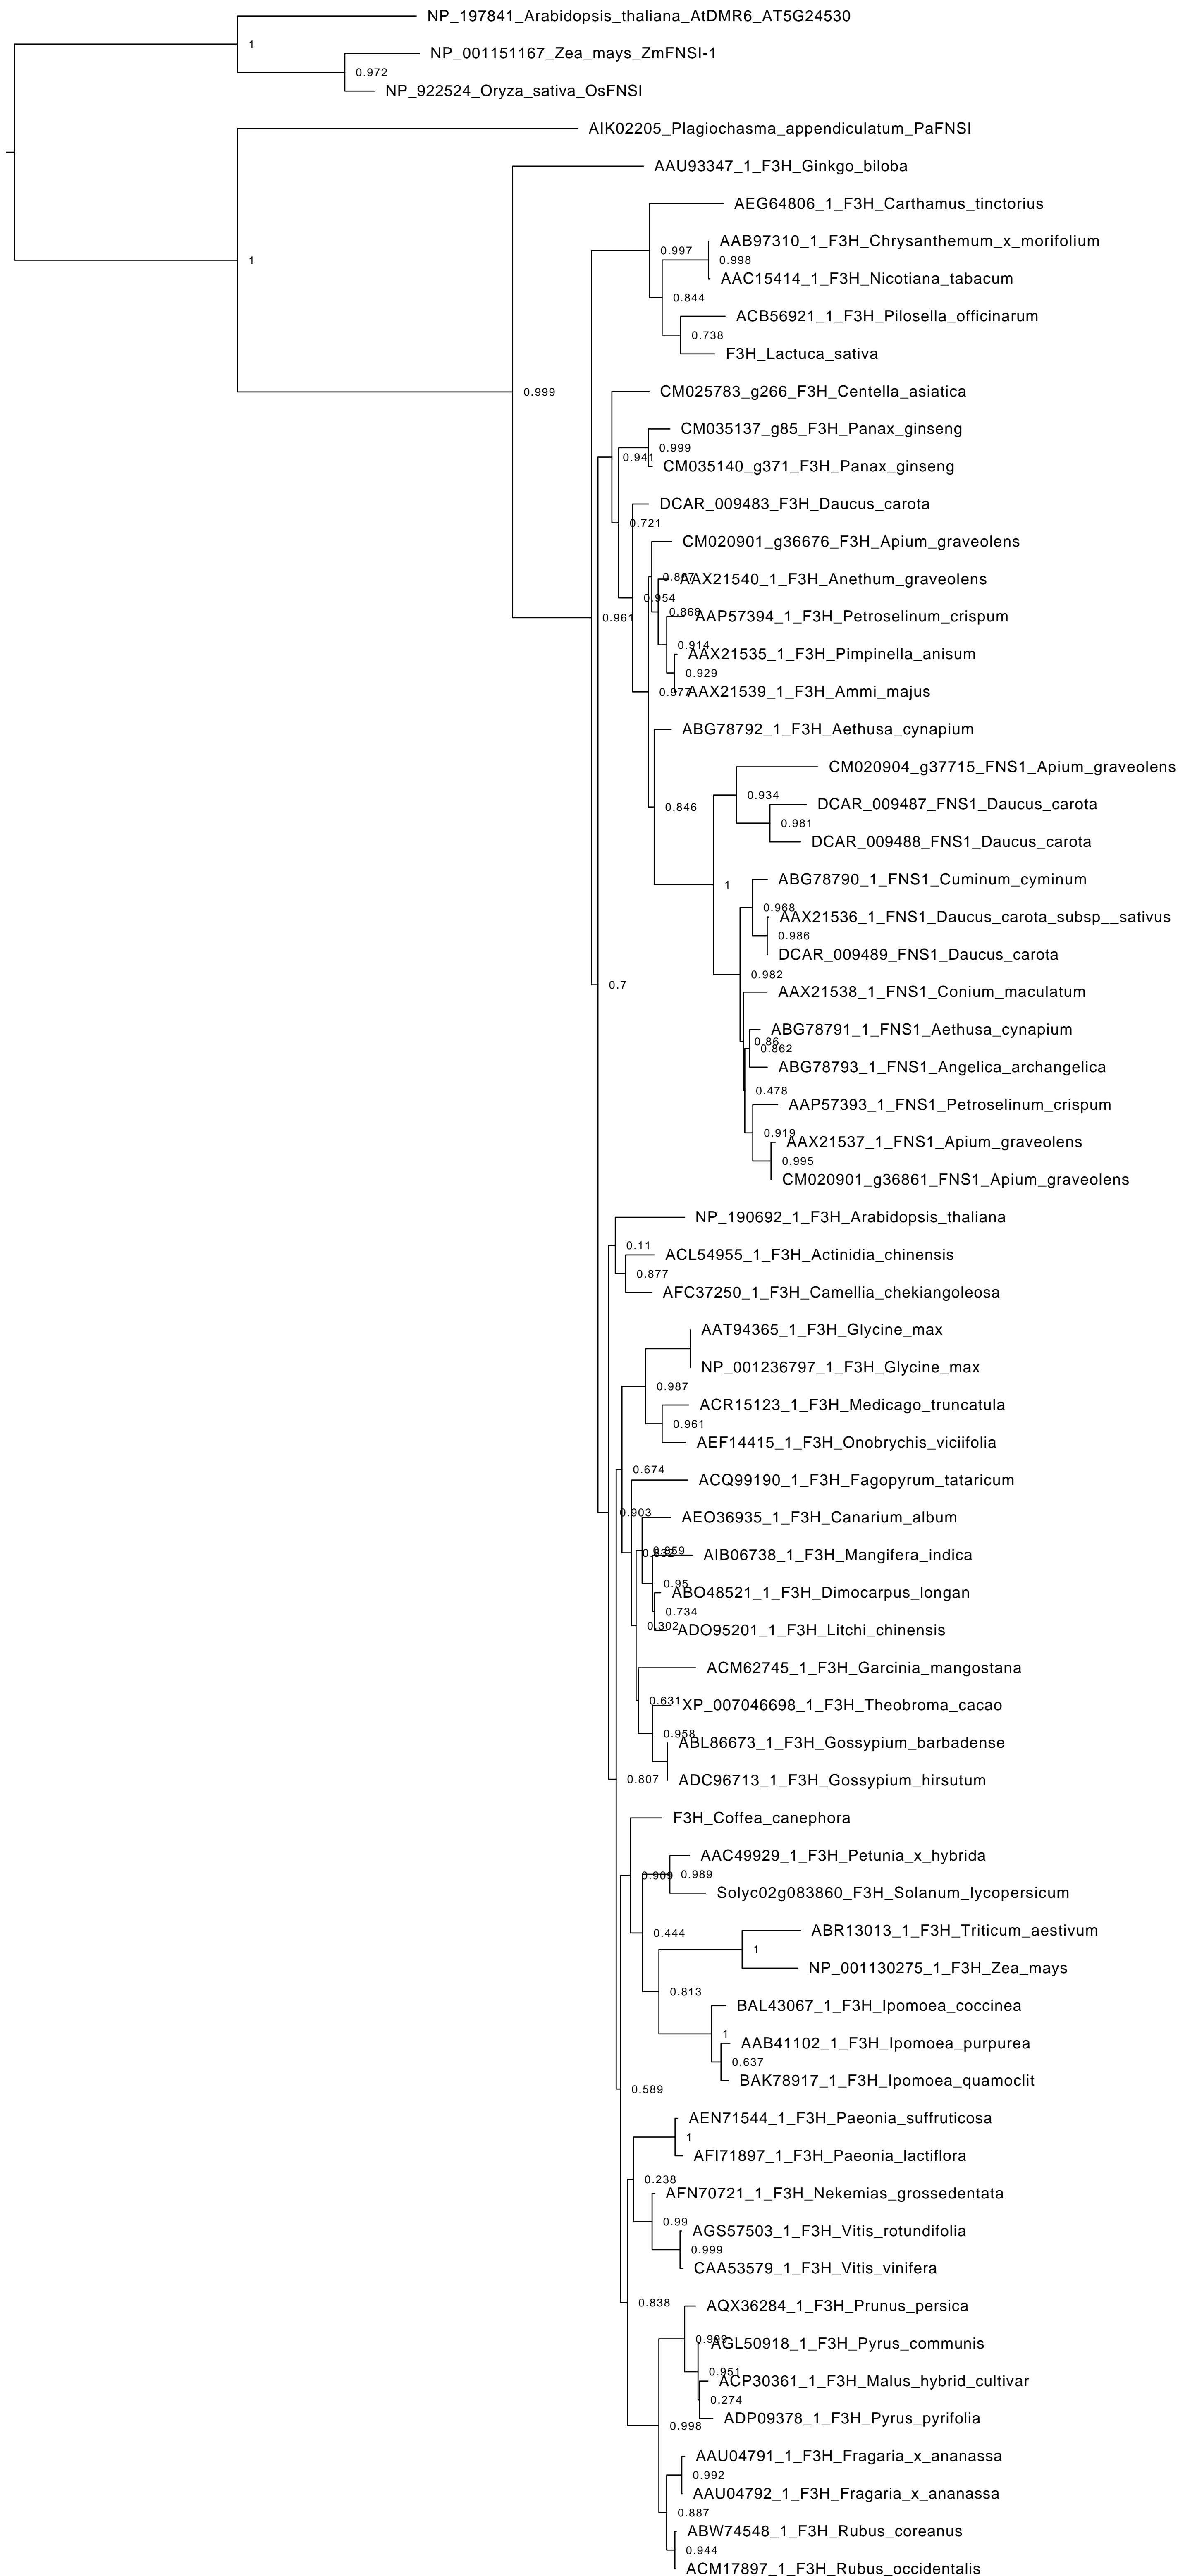

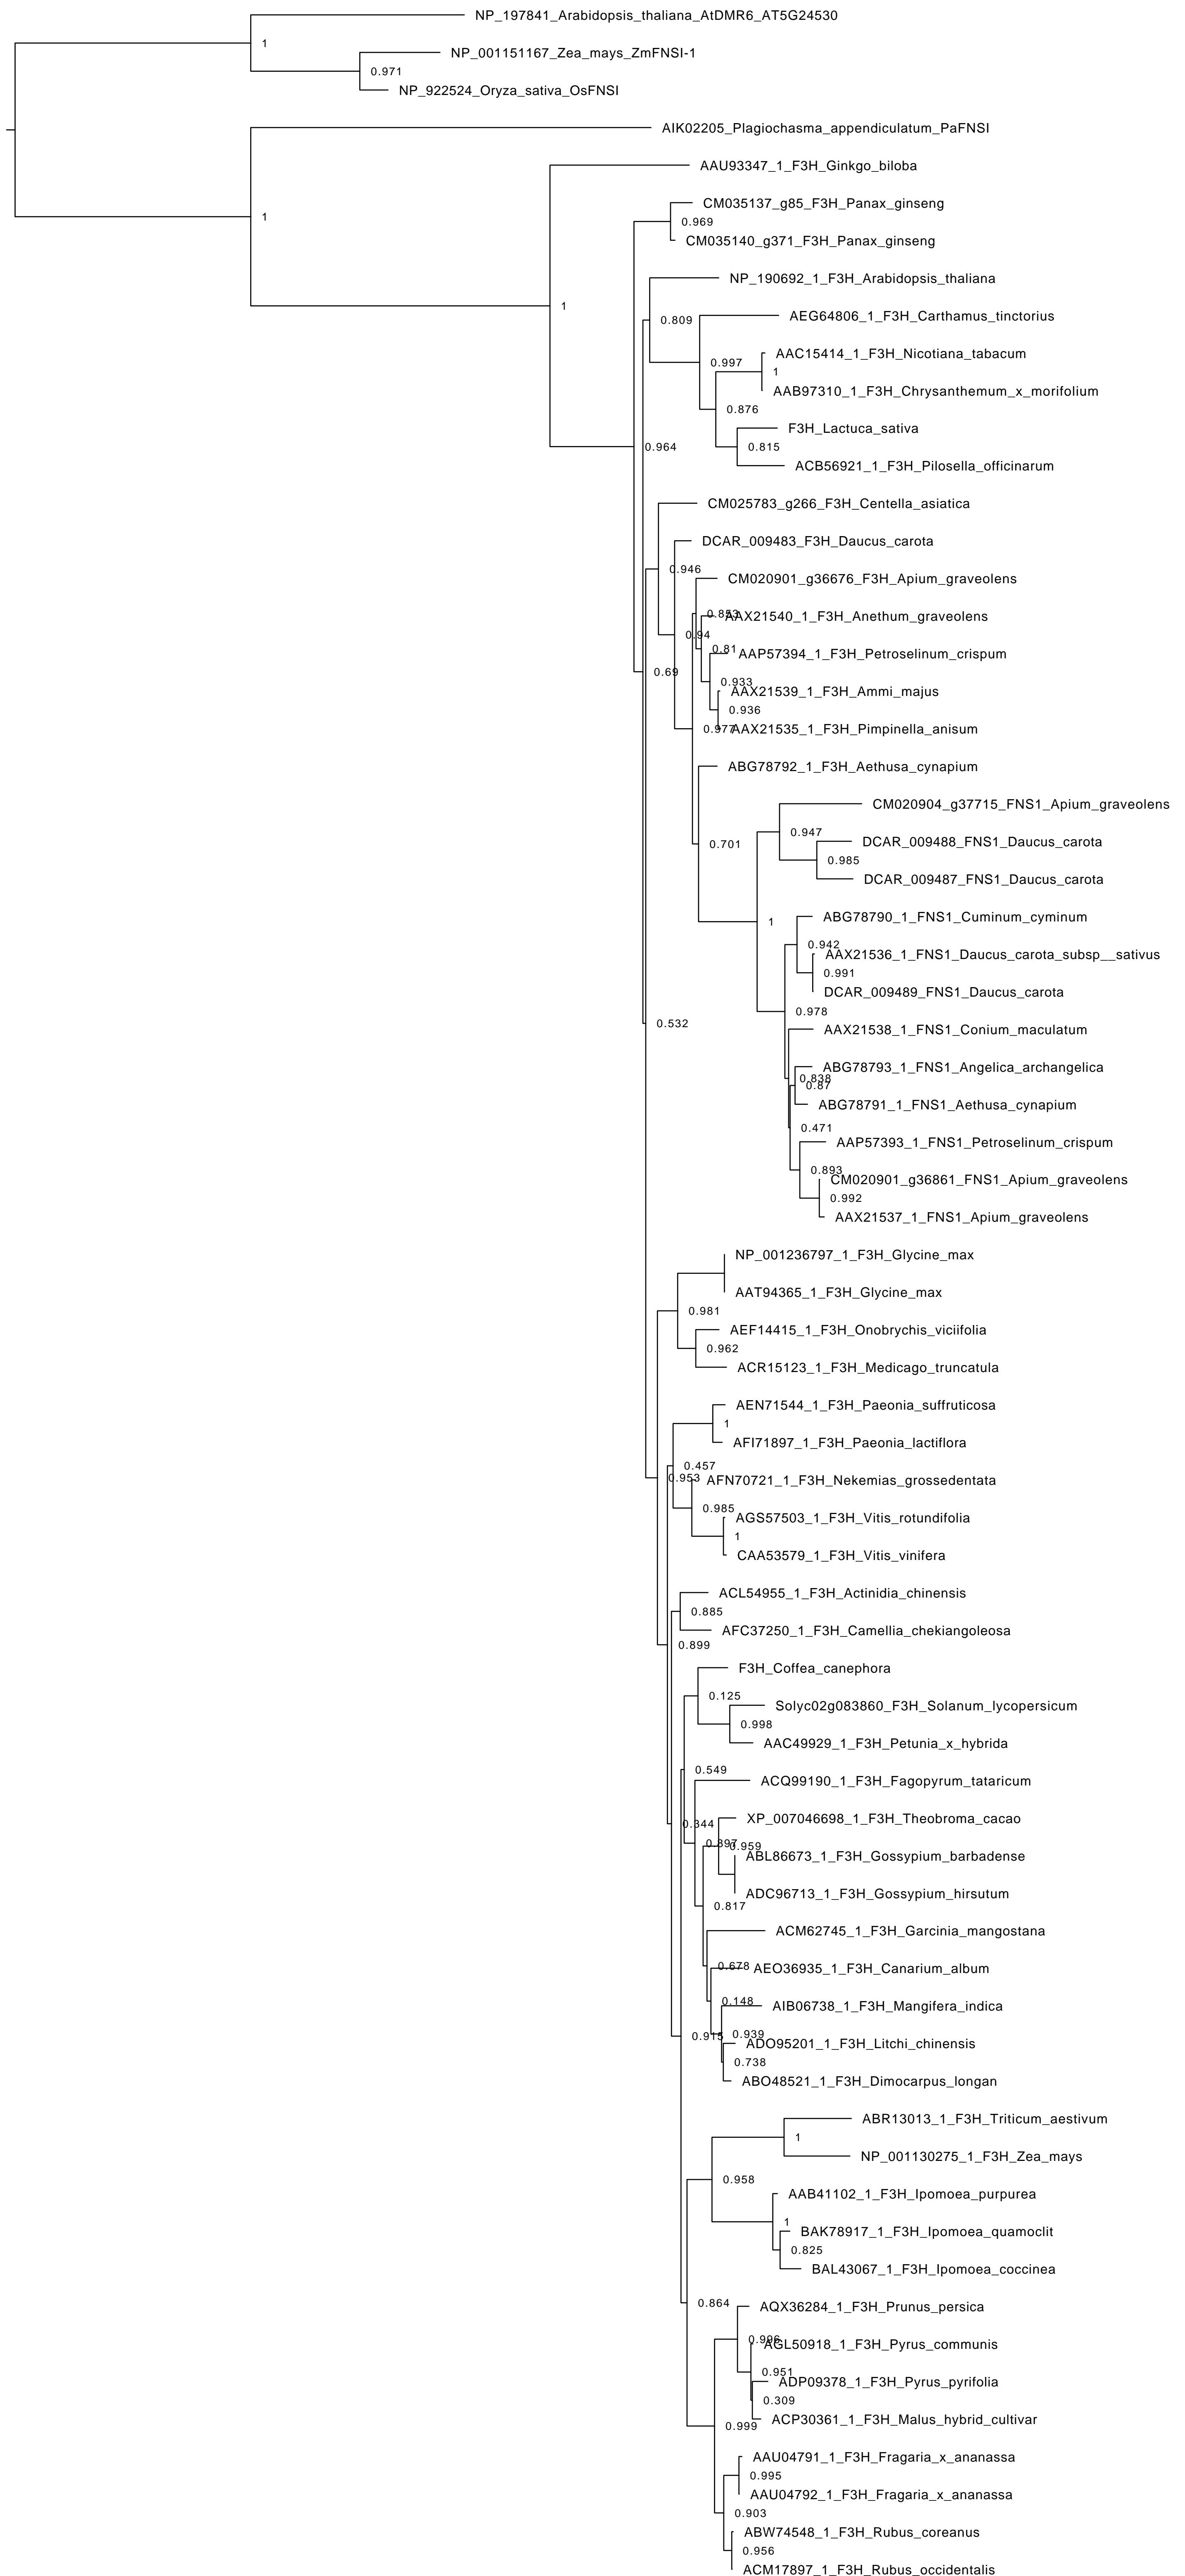

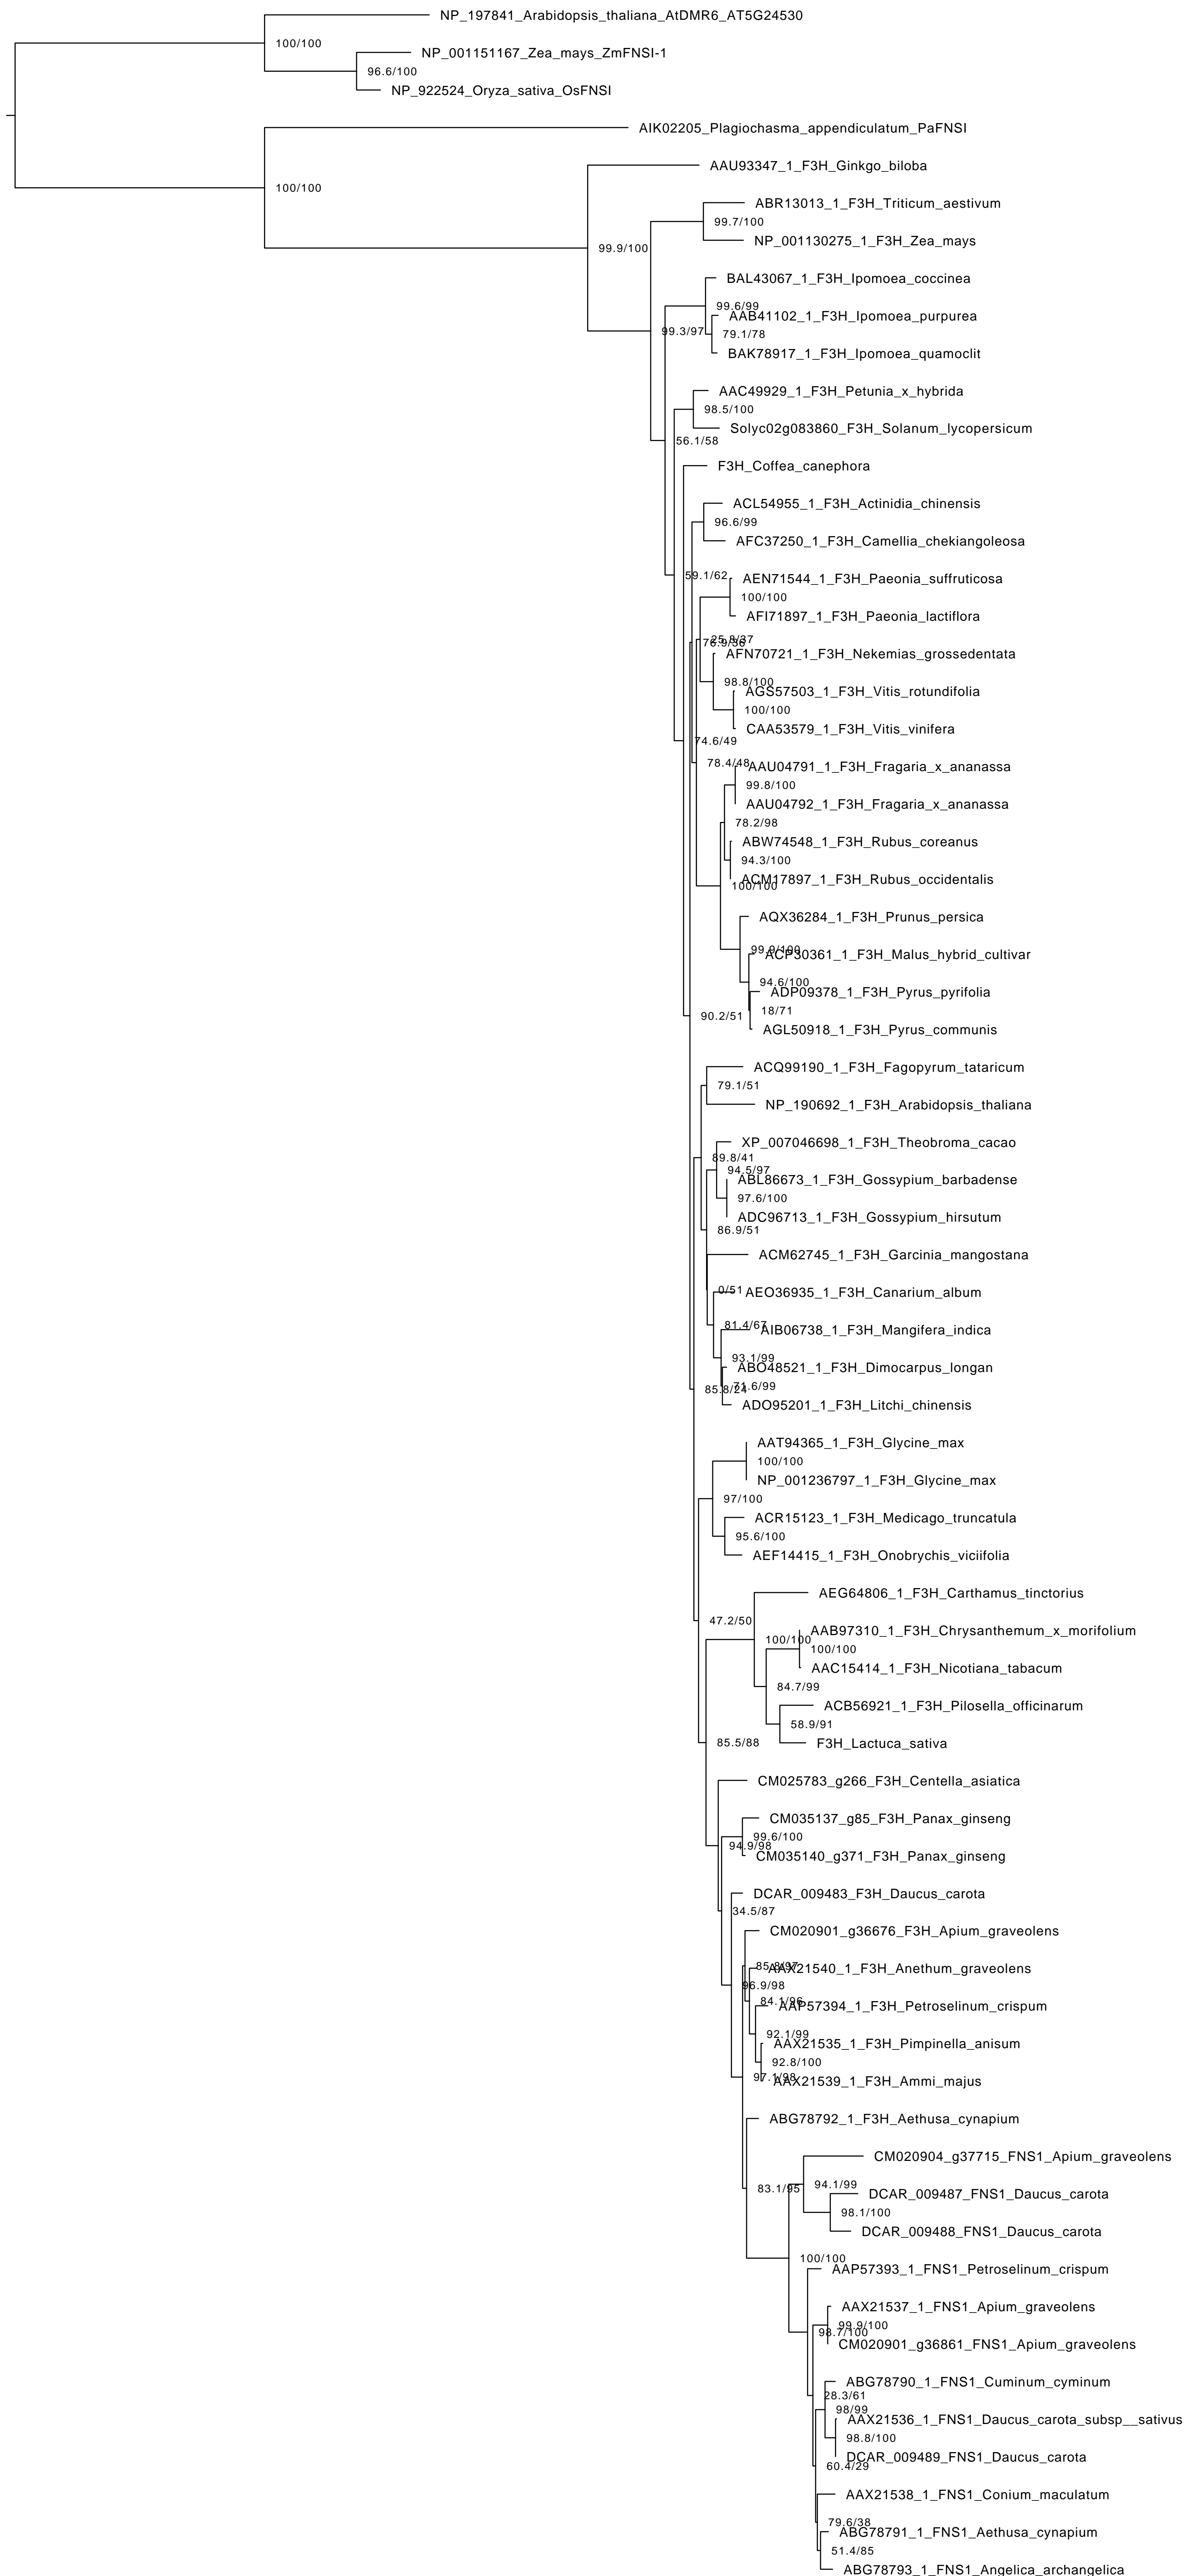

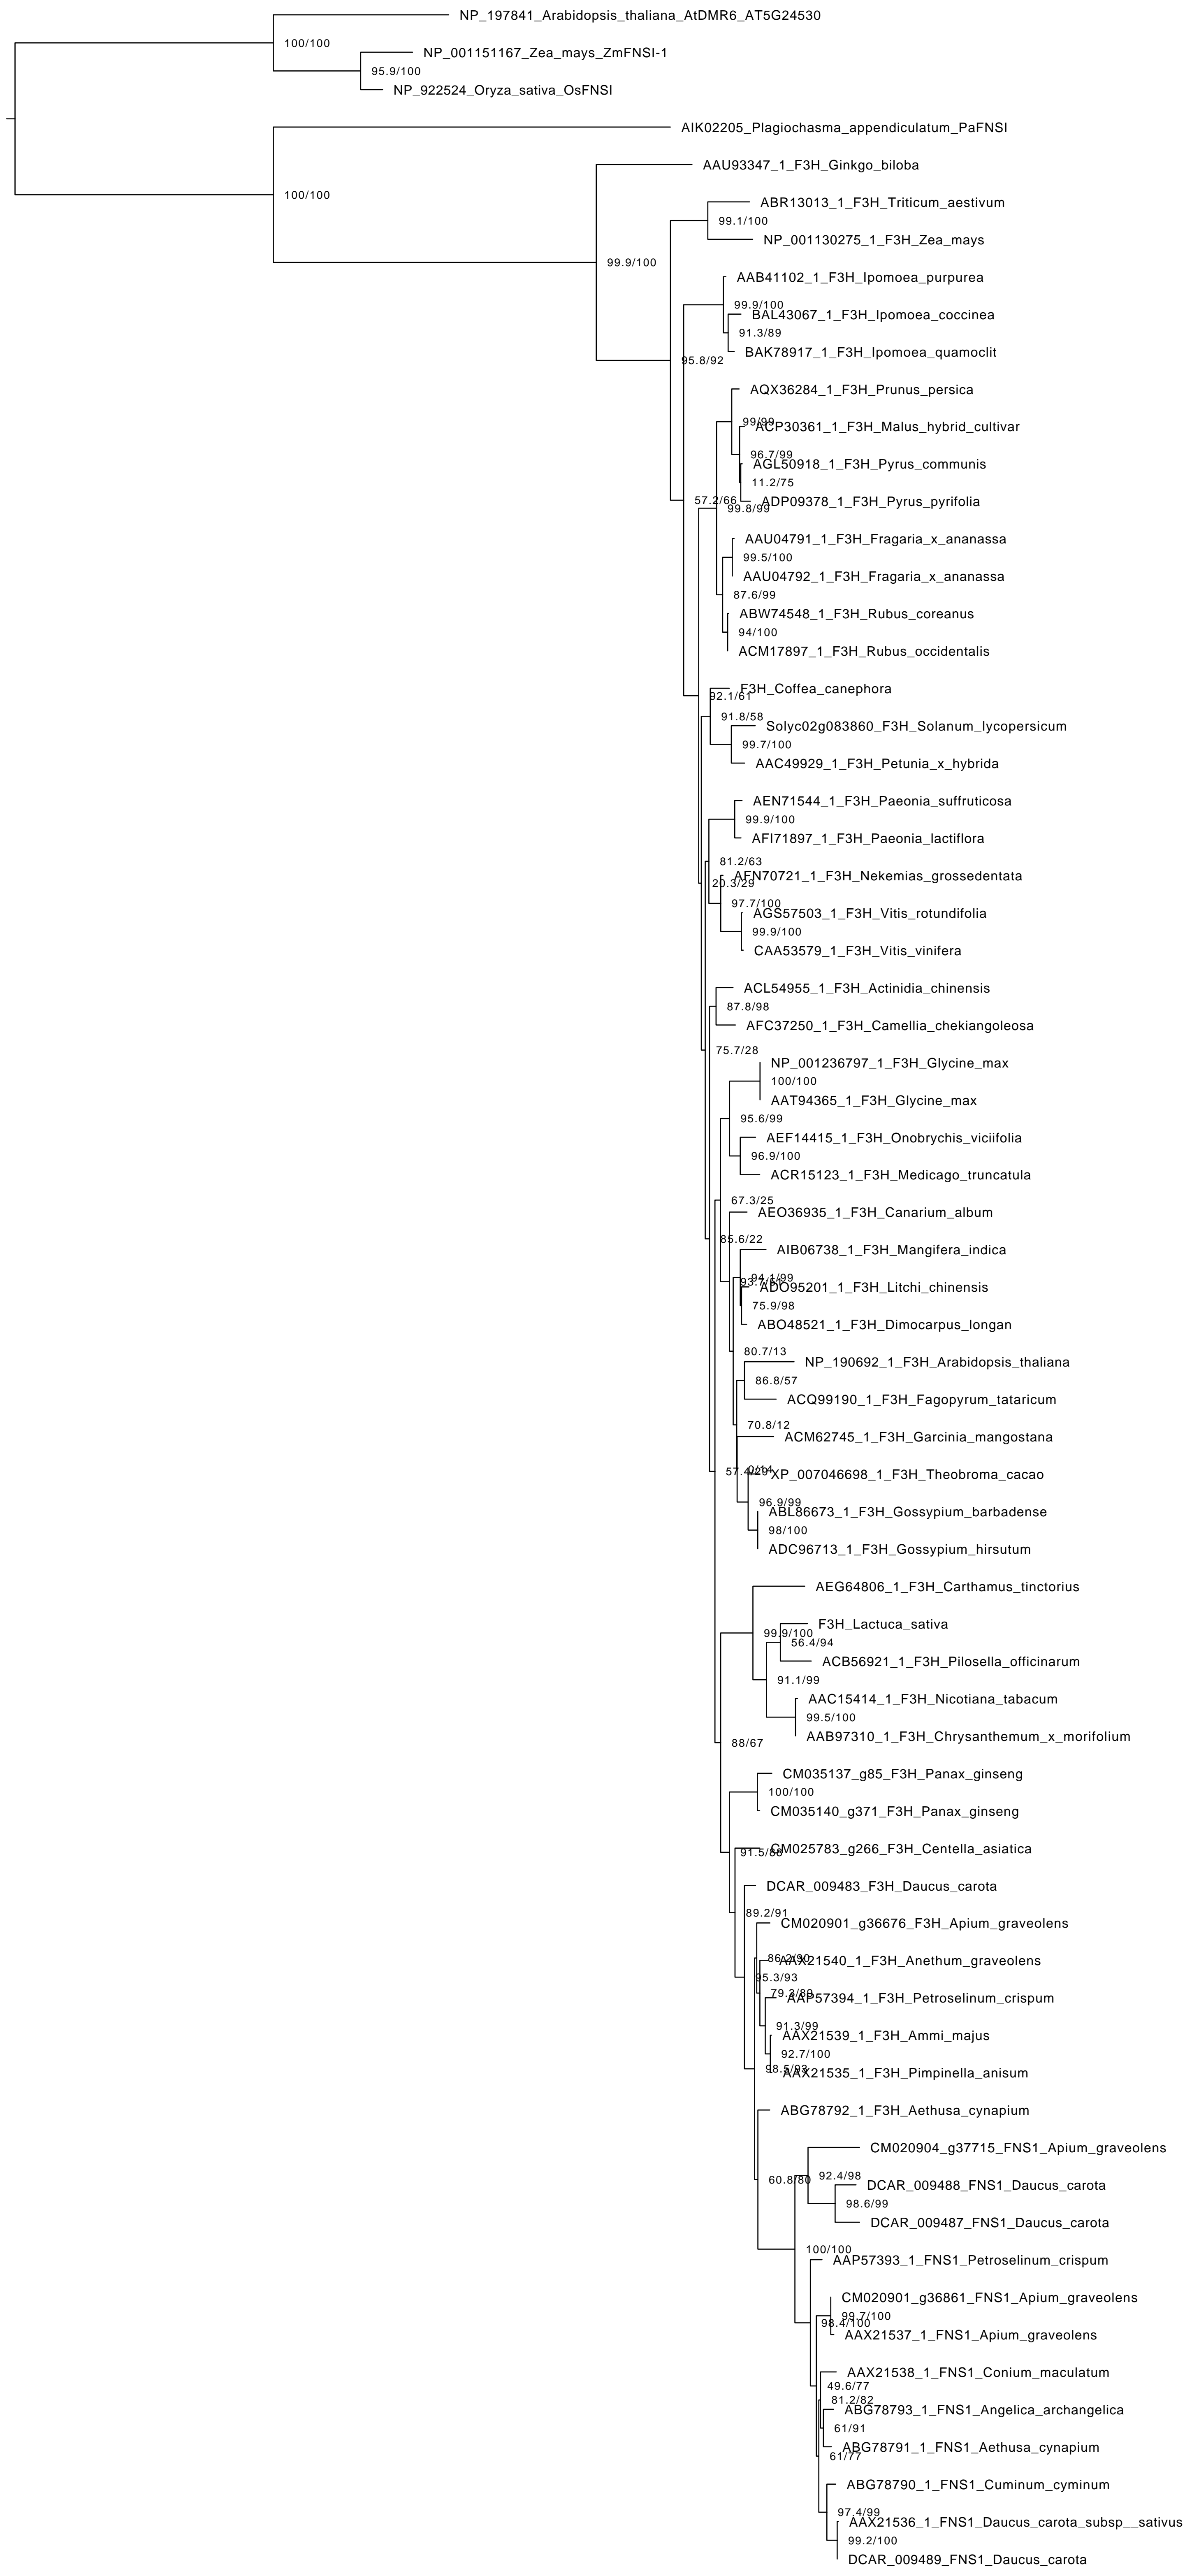

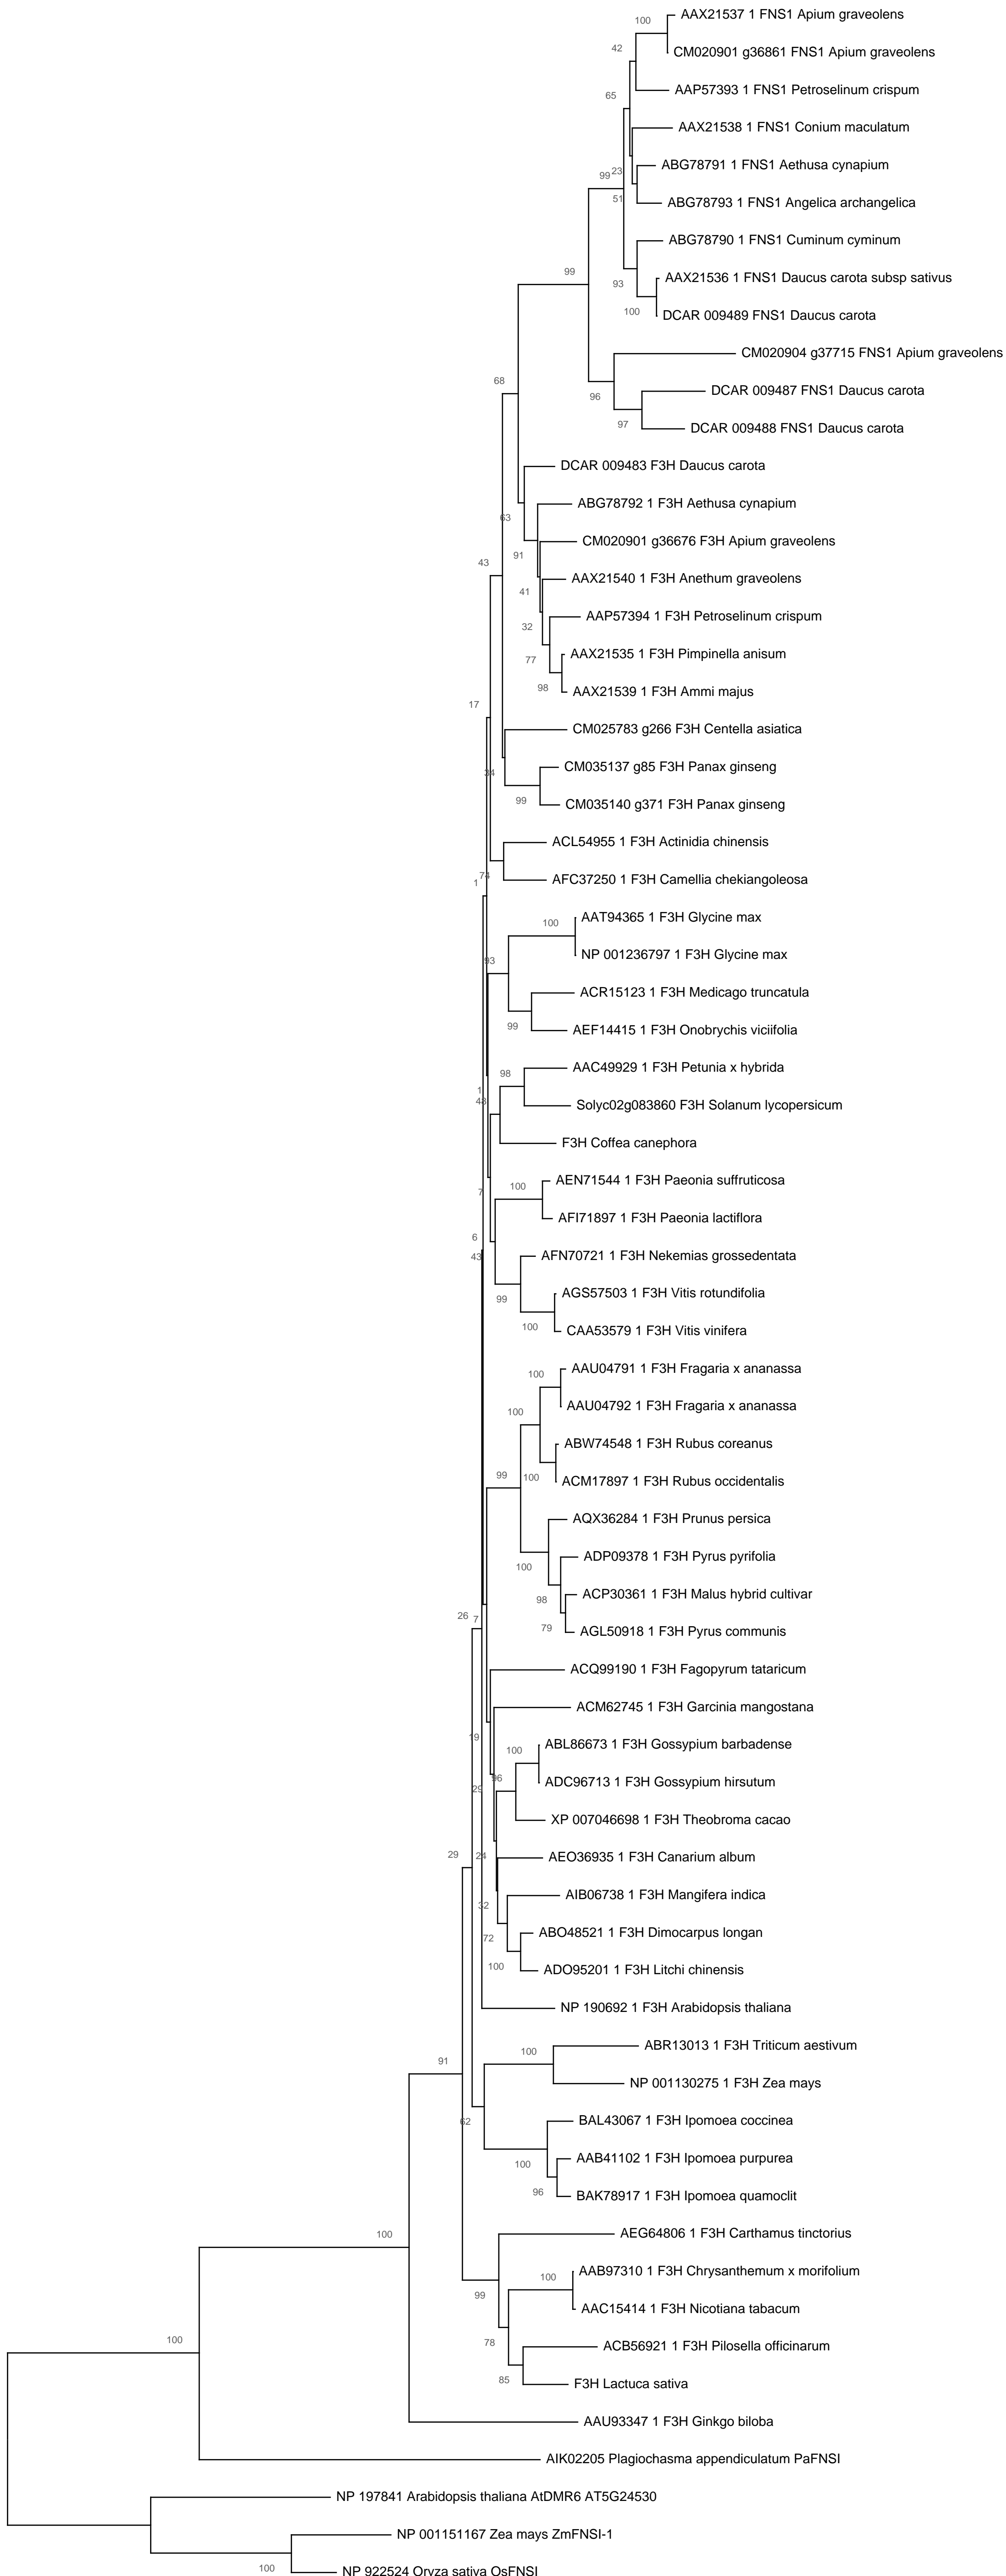

0.10

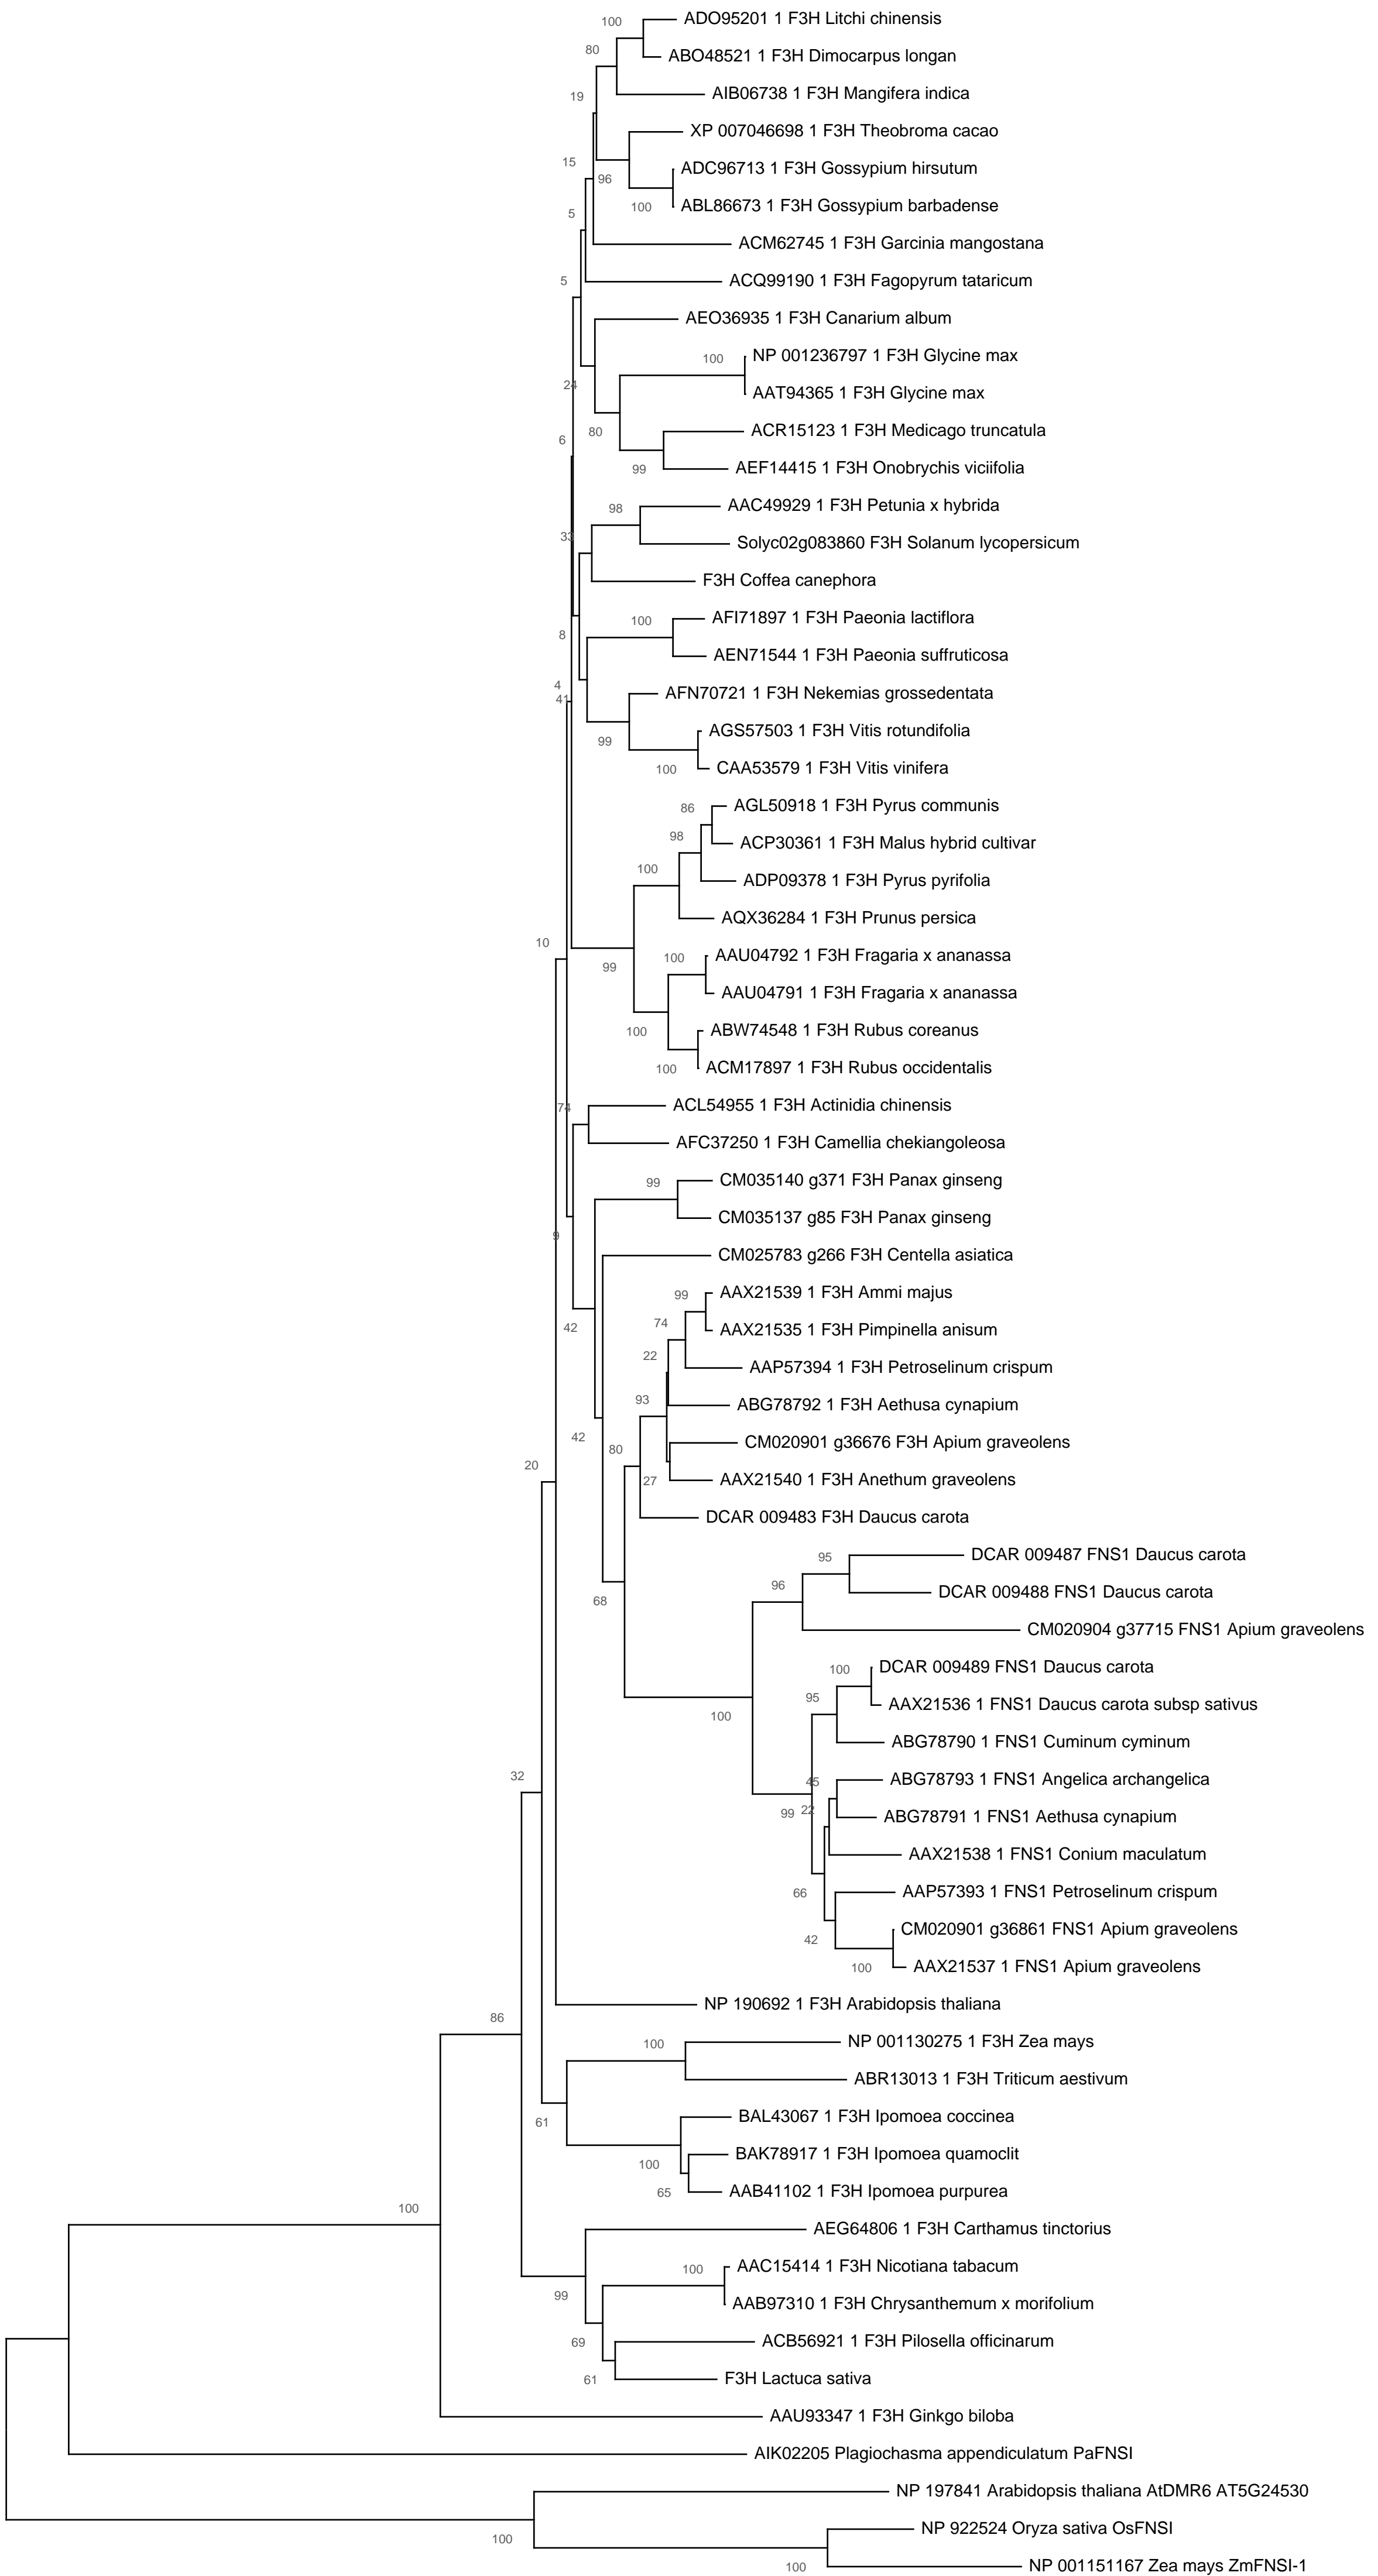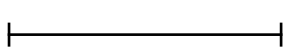

0.10
